# Supplementary material for: Graphene-type sheets of Nb1−xWxS2: synthesis and in situ functionalization
Source: Royal Society of Chemistry journal article supplement (doi:10.1039/c3dt32294g), 2013-01-01
Supplement: c3dt32294g.pdf [file c3dt32294g.pdf]

# Graphene-type Sheets of Nb<sub>1-x</sub>W<sub>x</sub>S<sub>2</sub>: Synthesis and *in situ* Functionalization

Faegheh Hoshyargar,<sup>a</sup> Jugal Kishore Sahoo,<sup>a</sup> Muhammad Nawaz Tahir,<sup>a</sup> Aswani Yella,<sup>a</sup> Michael Dietzsch,<sup>a</sup> Filipe Natalio,<sup>a</sup> Robert Branscheid,<sup>b</sup> Ute Kolb,<sup>b</sup> Martin Panthöfer<sup>a</sup> and Wolfgang Tremel,<sup>\*a</sup>

Received (in XXX, XXX) Xth XXXXXXXXX 200X, Accepted Xth XXXXXXXXX 200X

First published on the web Xth XXXXXXXXX 200X

DOI: 10.1039/b000000x

## Supporting Information

### Dynamic Light Scattering:

**I. Light Scattering Setup.** The DLS setup consisted of an ALV-5000 correlator, equipped with an ALV/SP125 goniometer and avalanche photodiode detector. An argon ion laser ( $\lambda = 514.5$  nm,  $P = 500$  mW output power) served as a coherent light source. Measurements were carried out at 30, 50, 70, 90, 110, 130 and 150° and at a temperature of 20°C. 5 runs were recorded at every angle to increase the signal to noise ratio.

**II. Dynamic Coefficient Measurements for the Fresh Sample.** The field correlation  $g_1(\tau)$  could be well fitted with the cumulant series expansion

$$g_1(\tau) = a + b \cdot \exp\left(-\frac{\tau}{c}\right) \cdot [1 + d \cdot \tau^2]$$

With  $a$  representing the baseline (which was subtracted before fitting) and  $b$  representing the amplitude.  $C$ , being the decay time of the correlation function, yields the z-average diffusion coefficient  $\langle D \rangle_{z,app} = 1/c \cdot q^2$  of the particles, with  $q$  as the scattering vector  $q = 4\pi n \sin(\theta/2)/\lambda_0$ . In cases of a polydisperse sample consisting of larger particles ( $d > \lambda/20$ ), a measurement performed at a finite angle only yields an apparent diffusion coefficient  $\langle D \rangle_{z,app}$ , which increases with the scattering angle due to the contribution of the particle form factor. The true z-average  $\langle D \rangle_z$  can then be obtained by extrapolating towards  $\theta = q^2 = 0$ .

Finally, the second cumulant  $d$  is a quantitative measure for the width of the diffusion coefficient distribution and hence for the dispersity of the sample

$$\sigma^2(D) = (\Delta D)^2 = \langle D^2 \rangle - \langle D \rangle^2 = \frac{2d}{q^4}$$

By applying Stokes-law of diffusion, which assumes spherically shaped particles, the hydrodynamic radius can be obtained from the diffusion coefficient

$$\langle R_H \rangle = \frac{kT}{6\pi\eta\langle D \rangle}$$

Linear extrapolation to  $\theta=q^2=0$  in Figure 5a yields a z-averaged diffusion coefficient of

$\langle D \rangle_z = 3.20 \times 10^{-8} \text{ cm}^2/\text{s}$  and a hydrodynamic radius of  $R_H = 67 \text{ nm}$ .

The second coefficient of the cumulant series expansion represents a quantitative measure for the dispersity of the sample. At  $90^\circ$ , a standard deviation of  $\sigma(D) = 0.856 \times 10^{-8} \text{ cm}^2/\text{s}$  was obtained, which was used to plot the distribution curve, based on a standard deviation.

**III. Diffusion Coefficient Measurements after 4 Weeks.** From the same stock solution ( $[\text{Nb}_{1-x}\text{W}_x\text{S}_2] = 0.05 \text{ mg/mL}$ ), a new sample was prepared ( $[\text{NaCl}] = 10 \text{ mM}$ ,  $[\text{Nb}_{1-x}\text{W}_x\text{S}_2] = 0.01 \text{ mg/mL}$ ) 4 weeks later shows the diffusion coefficients measured at different angles and via linear extrapolation a diffusion coefficient of  $\langle D \rangle_z = 2.67 \cdot 10^{-8} \text{ cm}^2/\text{s}$  and a hydrodynamic radius of  $R_H = 80 \text{ nm}$  are obtained. Using the second cumulant, a standard deviation of  $\sigma = 1.03 \cdot 10^{-8} \text{ cm}^2/\text{s}$  was calculated. The particles increased in size and also the diffusion coefficient distribution became broader, which indicates aggregation over time.

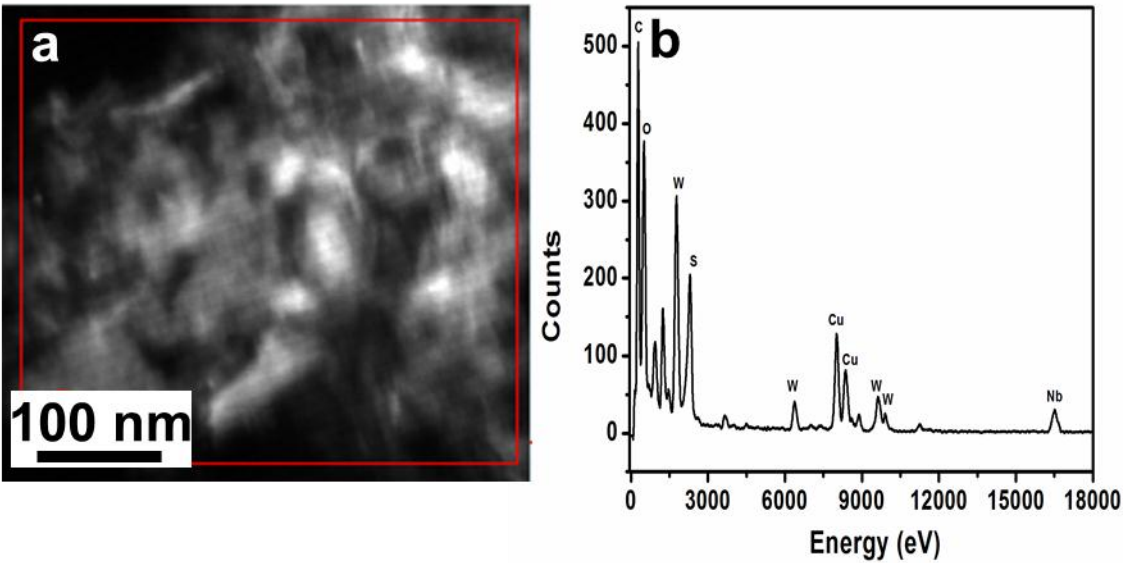

**Fig. S1.** (a) STEM image of the exfoliated coin rolls (b) EDX spectrum of the selected area.

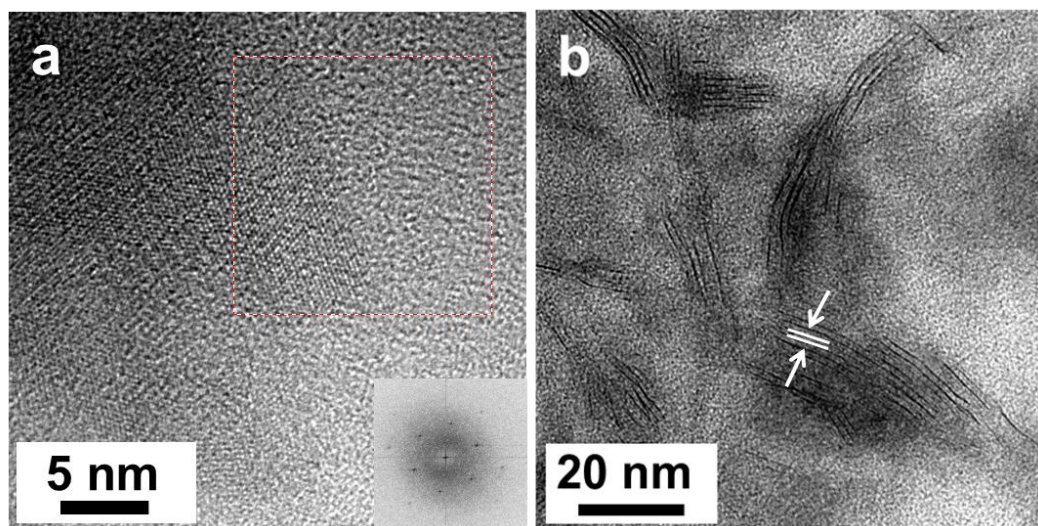

**Fig. S2.** (a) HRTEM image on the rim of a sheet (Inset: FFT on the selected area). (b) HRTEM image of few-layer sheets with an interlayer distance of  $\sim 12\text{\AA}$ .

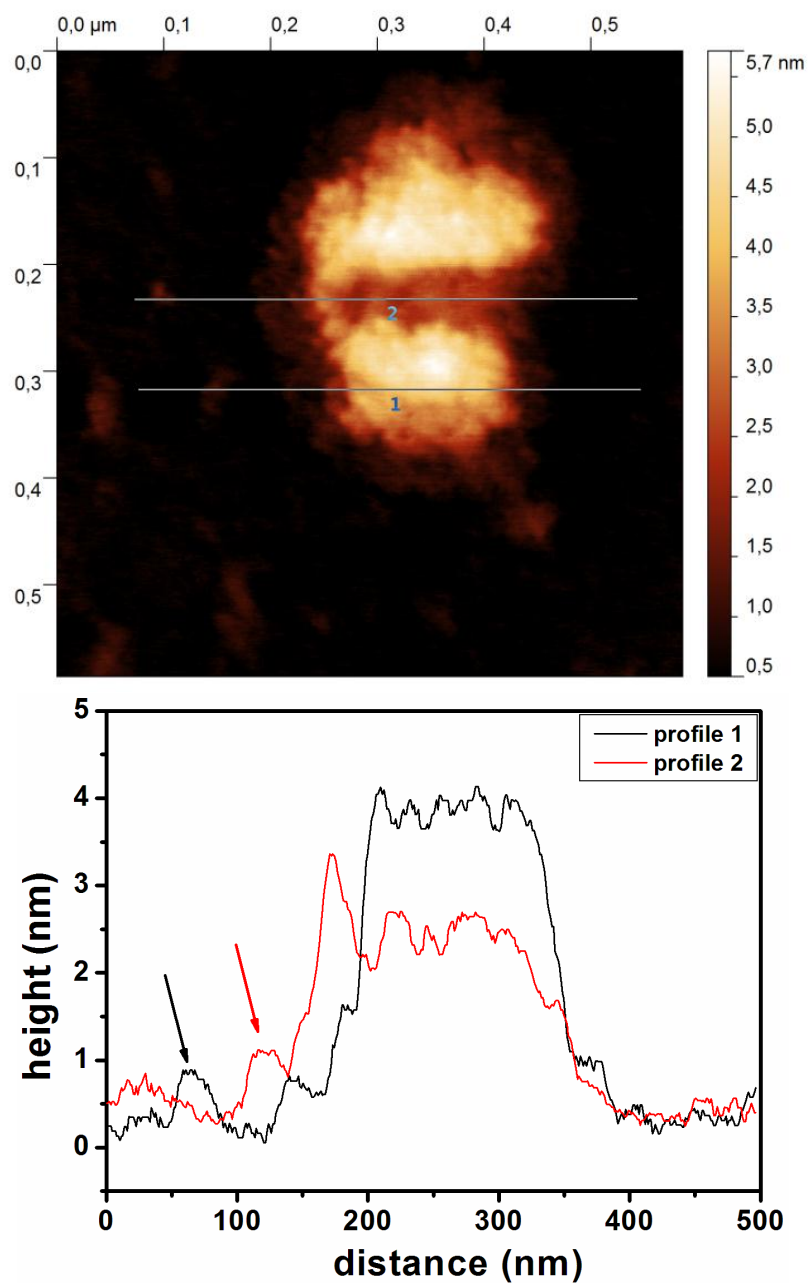

**Fig. S3.** SFM height image and corresponding profiles at various points to show the height of graphene-type sheets of  $\text{Nb}_{1-x}\text{W}_x\text{S}_2$ .

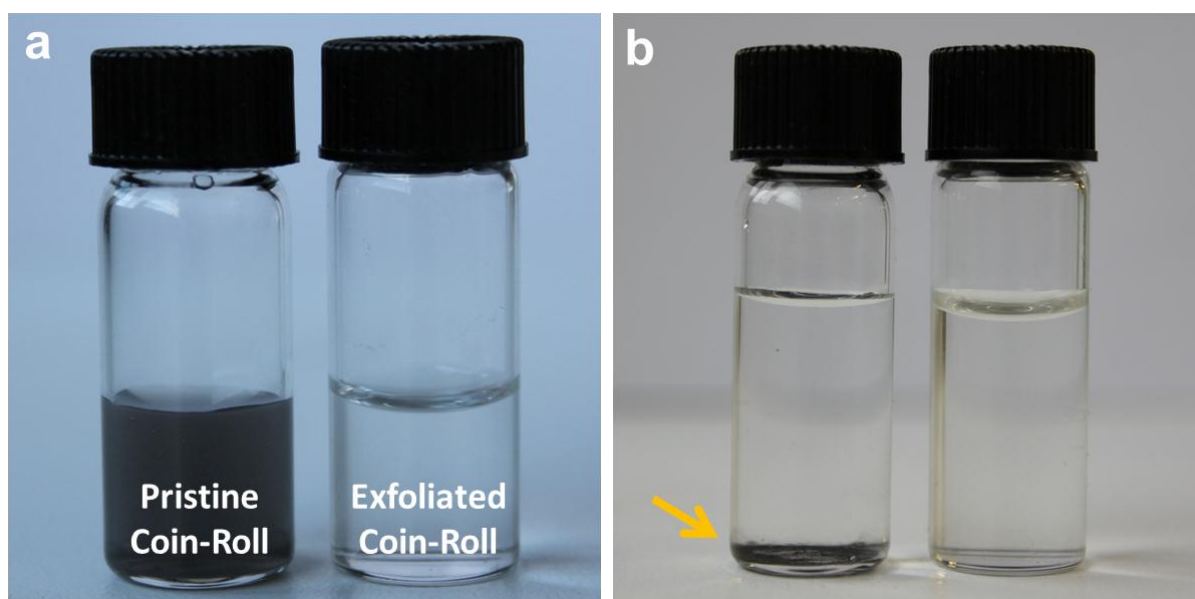

**Fig. S4.** (a) Digital micrograph of the coin-roll nanowires before (left) and after (right) exfoliation. (b) The same samples after 3 hours, showing the sedimentation of the dispersed pristine coin-roll nanowires.

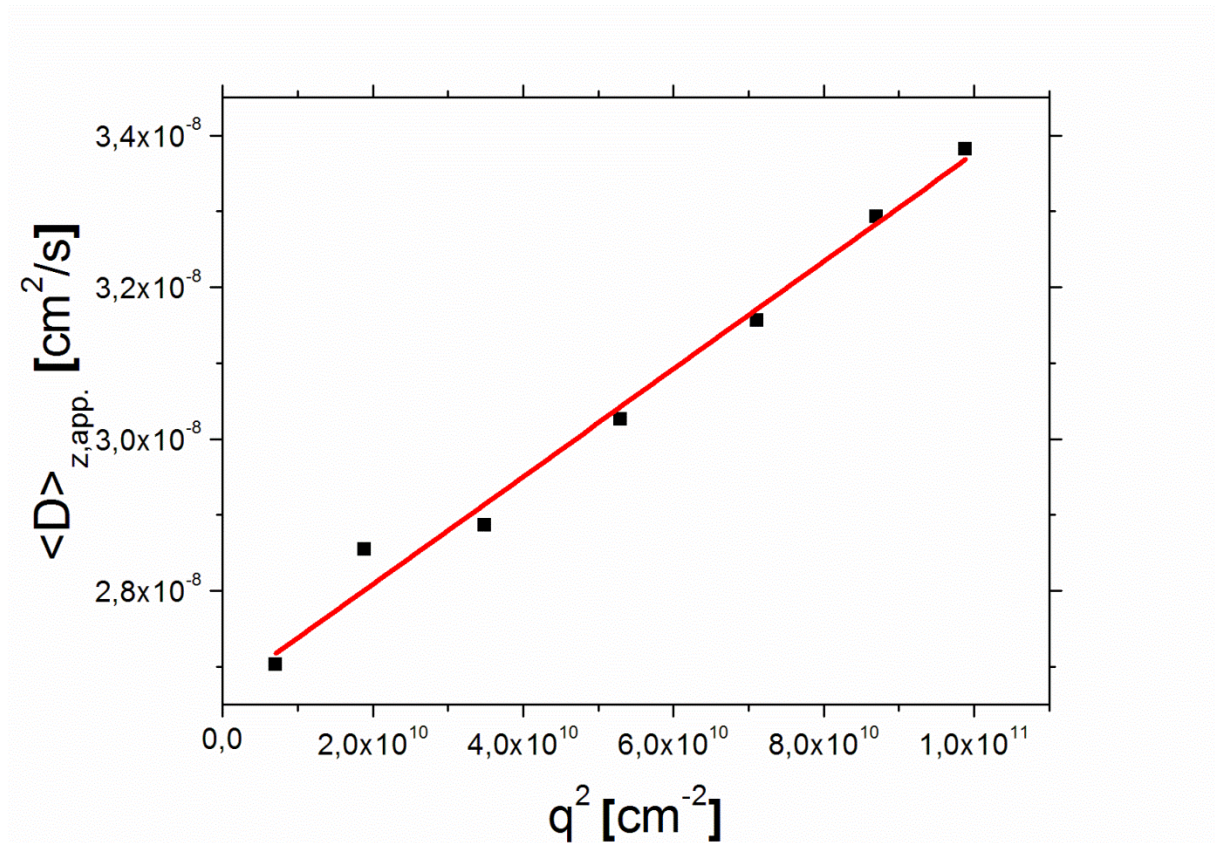

**Fig. S5.** Diffusion coefficients of the graphene-type sheets of Nb<sub>1-x</sub>W<sub>x</sub>S<sub>2</sub> recorded at different angles after 4 weeks.

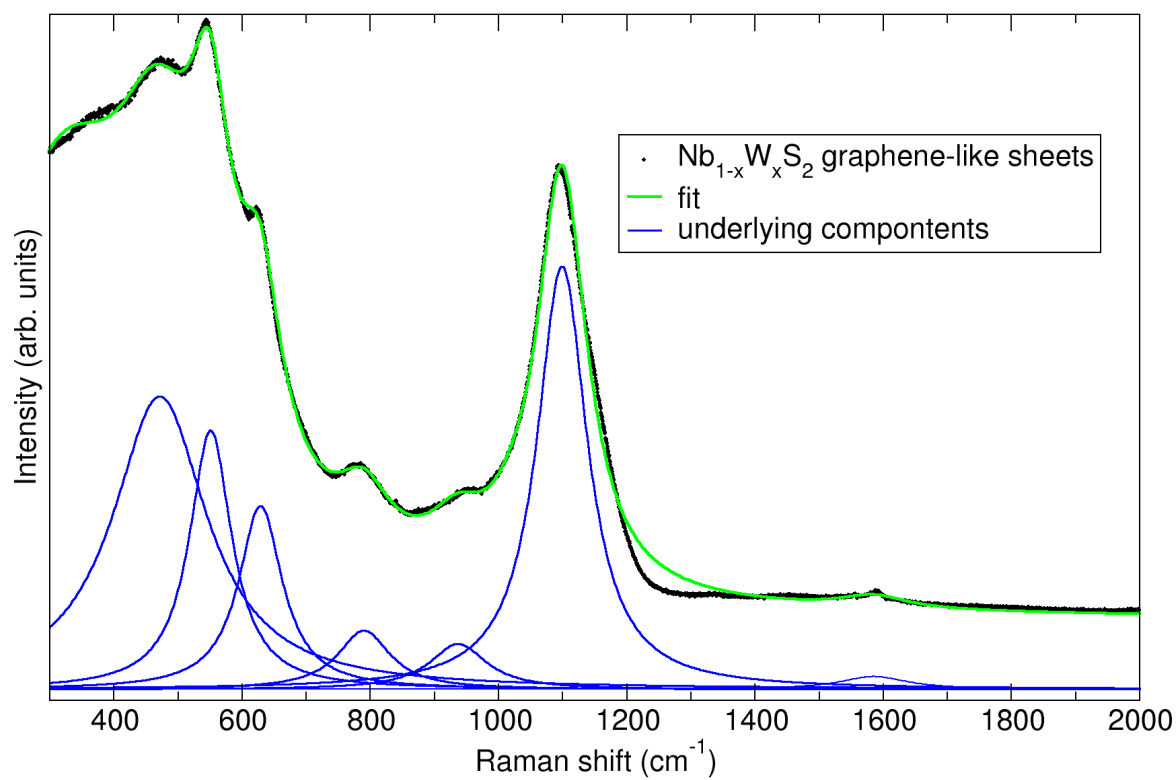

**Fig. S6.** Raman spectrum of exfoliated graphene-type sheets of  $\text{Nb}_{1-x}\text{W}_x\text{S}_2$

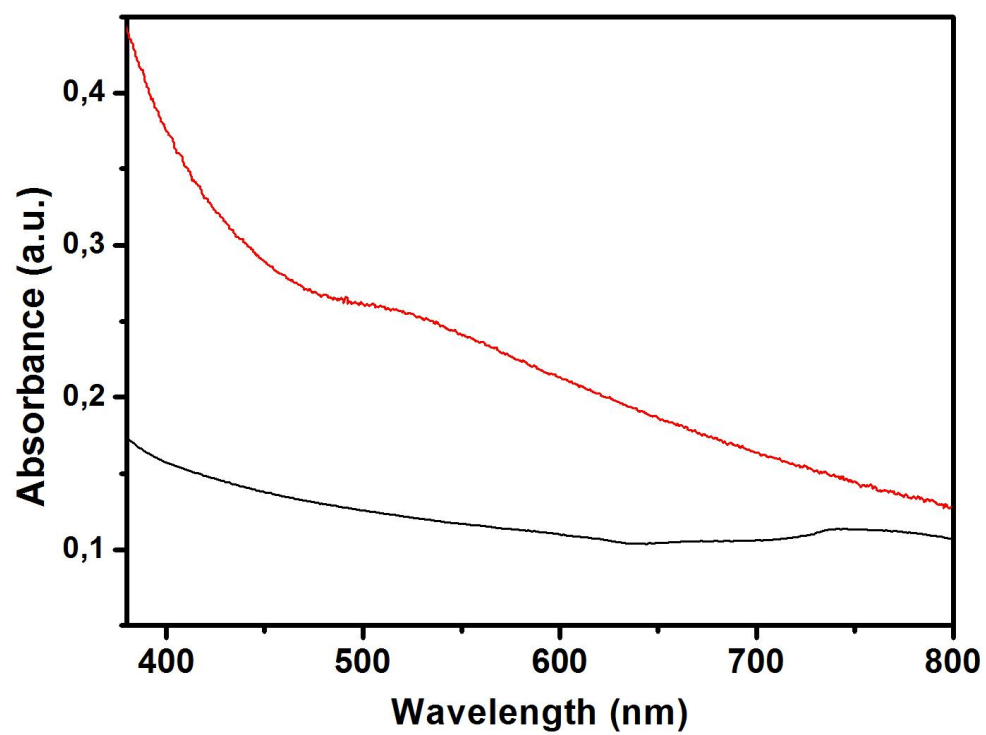

**Fig. S7.** UV/Vis absorption spectrum of: synthesized graphene-type sheets of Nb<sub>1-x</sub>W<sub>x</sub>S<sub>2</sub> (black line) Au nanoparticles functionalized (red line)

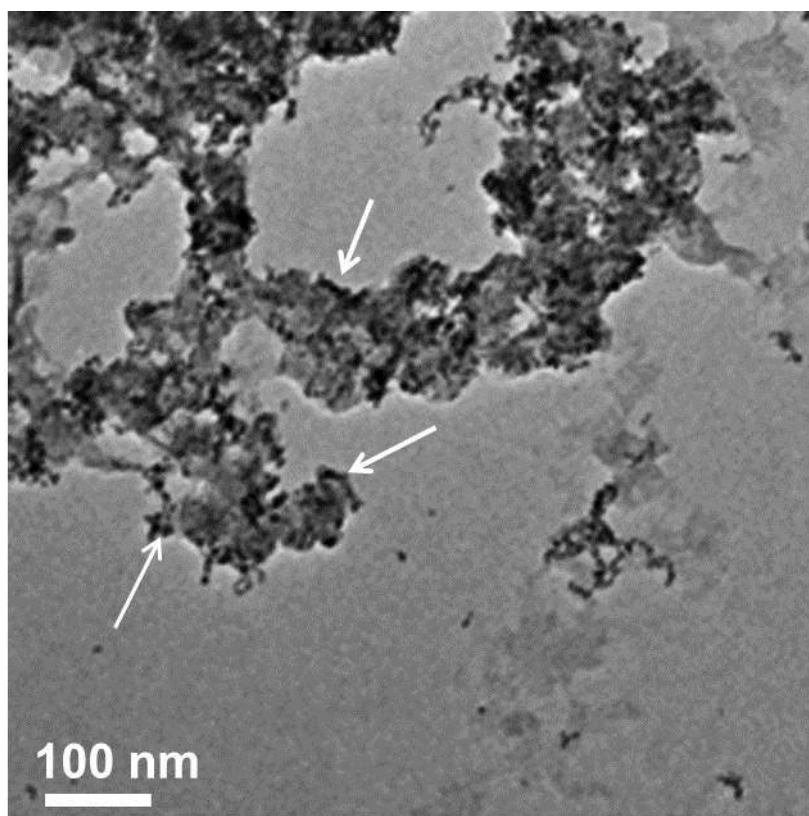

**Fig. S8.** TEM image showing the nucleation and growth of gold nanoparticles mostly edges of sheets as indicated by arrows.
